# Supplementary material for: Loss of CIB2 Causes Profound Hearing Loss and Abolishes Mechanoelectrical Transduction in Mice
Source: PubMed Central journal article supplement (PMC5722843; doi:10.3389/fnmol.2017.00401), 2017-12-04
Supplement: Data_Sheet_1.pdf [file Data_Sheet_1.pdf]

# **Loss of CIB2 causes profound hearing loss and abolishes mechanoelectrical transduction in mice**

Yanfei Wang<sup>1,2†</sup>, Jie Li<sup>3†</sup>, Xuerui Yao<sup>1,2†</sup>, Wei Li<sup>1,2</sup>, Haibo Du<sup>1,2</sup>, Mingliang Tang<sup>4,5</sup>, Wei Xiong<sup>3</sup>, Renjie Chai<sup>4,5,6\*</sup>, Zhigang Xu<sup>1,2\*</sup>

<sup>1</sup>Shandong Provincial Key Laboratory of Animal Cells and Developmental Biology, Shandong University School of Life Sciences, Jinan, China.

<sup>2</sup>Shandong Provincial Collaborative Innovation Center of Cell Biology, Shandong Normal University, Jinan, China

<sup>3</sup>School of Life Sciences, IDG/McGovern Institute for Brain Research, Tsinghua University, Beijing, China

<sup>4</sup>Key Laboratory for Developmental Genes and Human Disease, Ministry of Education, Institute of Life Sciences, Southeast University, Nanjing, China

<sup>5</sup>Co-Innovation Center of Neuroregeneration, Nantong University, Nantong, China

<sup>6</sup>Jiangsu Province High-Tech Key Laboratory for Bio-Medical Research, Southeast University, Nanjing, China

†Contributed equally to this work

\*Corresponding author:

Renjie Chai, E-mail: renjie@seu.edu.cn, Tel/Fax: 86-25-83790971

Zhigang Xu, E-mail: xuzg@sdu.edu.cn, Tel/Fax: 86-531-88362647

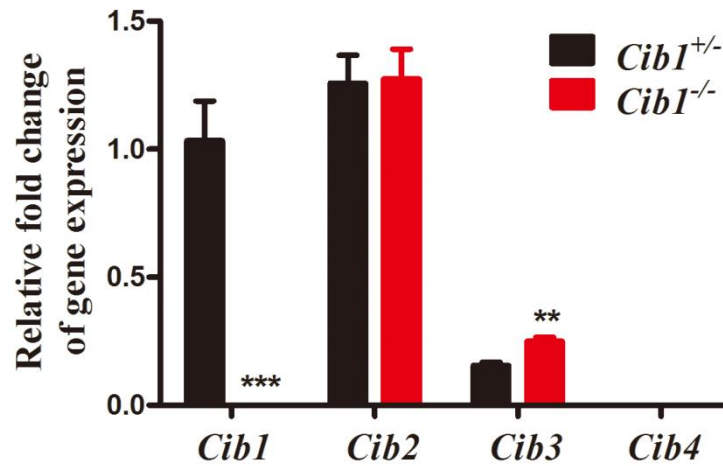

**Figure S1. Expression of *Cib1*, *Cib2*, *Cib3*, and *Cib4* in the inner ear of *Cib1* knockout mice.** Total RNA of P30 mouse inner ear was extracted and reverse transcribed, and expression of *Cib* genes were examined with quantitative PCR. The differences were evaluated by Student's t-test (\*\*  $p < 0.01$ ; \*\*\*  $p < 0.001$ ).

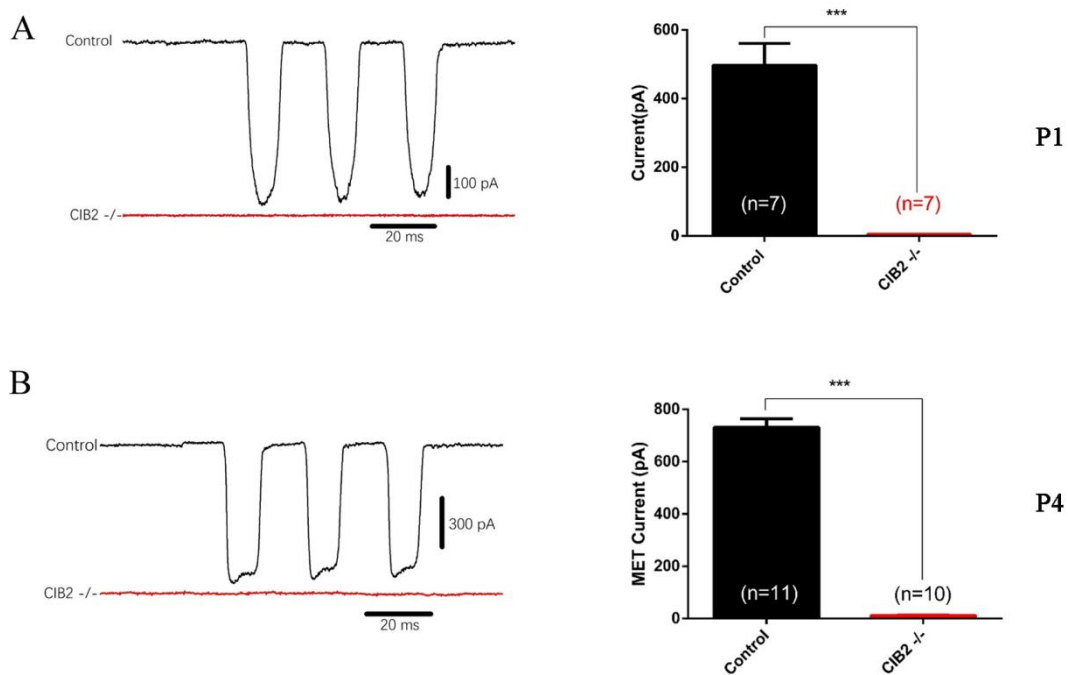

**Figure S2. Mechanosensitivity of hair cells is lost in *Cib2* knockout mice.** A fluid jet system that drives a sinusoidal deflection of hair bundles was used to evaluate the saturating MET current from hair cells. The average peak current is shown at right. (A) P1 OHCs; (B) P4 OHCs. The differences were evaluated by Student's t-test (\*\*  $p < 0.001$ ).

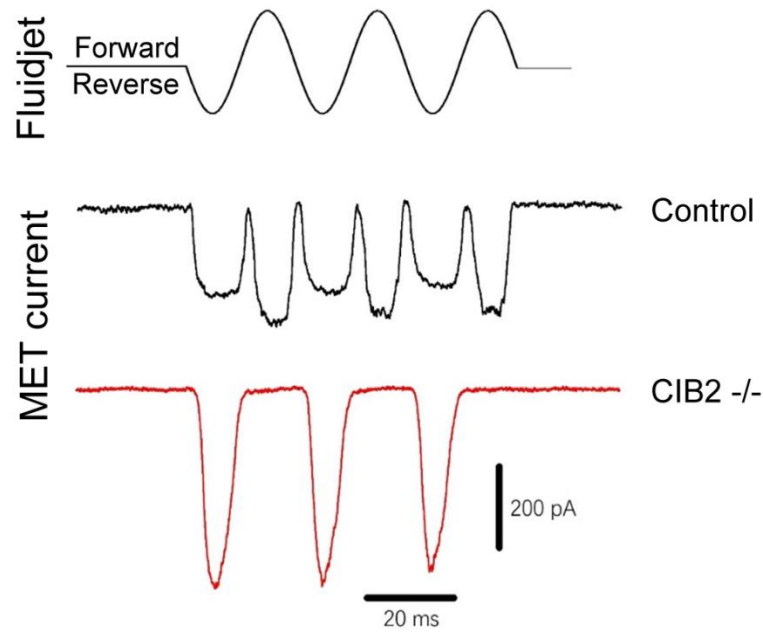

**Figure S3. Reverse-polarity mechanosensitivity of hair cells is maintained in *Cib2* knockout mice.** A fluid jet system was used to evaluate the conventional as well as reverse-polarity MET current from P4 OHCs.

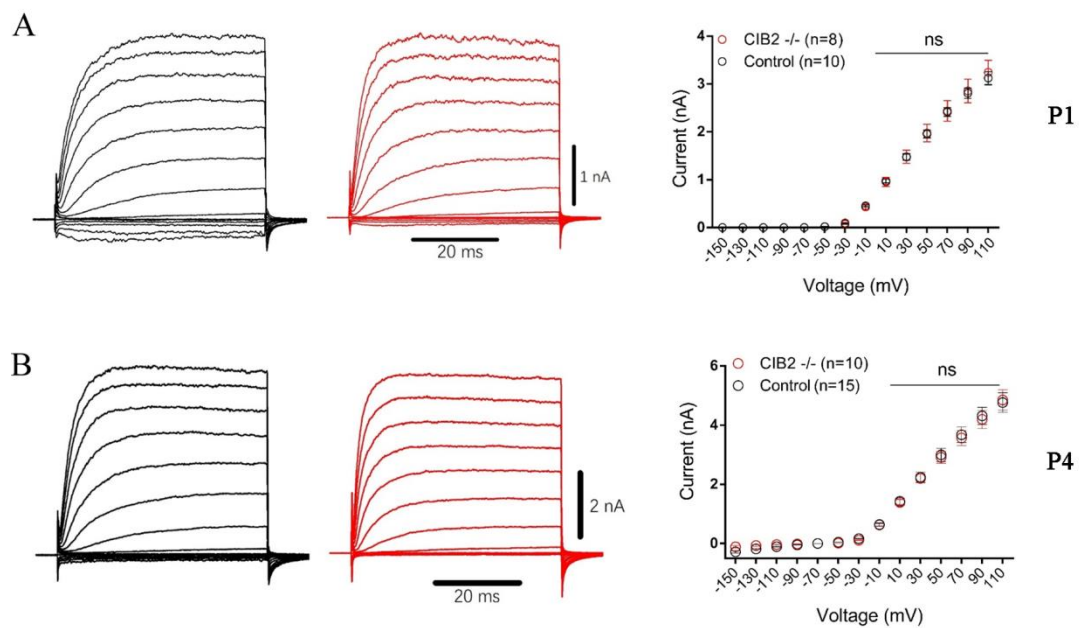

**Figure S4. Voltage-gated current is normal in *Cib2* knockout OHCs at early developmental stages.** The membrane potential was changed from  $-150$  mV to  $+110$  mV in  $20$  mV steps, and voltage-gated current was recorded from control and *Cib2* knockout OHCs. Current–voltage (I–V) curves were drawn from data collected from multiple cells. (A) P1 OHCs; (B) P4 OHCs. The differences were evaluated by Student's t-test (ns, not significant).
